# Supplementary material for: Aromatherapy, massage and reflexology: A systematic review and thematic synthesis of the perspectives from people with palliative care needs
Source: PubMed Central journal article supplement — Palliat Med. 2019 May 6;33(7):757–69. doi: 10.1177/0269216319846440 (PMC6985994; doi:10.1177/0269216319846440), 2019-05-06
Supplement: 846440_supp_mat.pdf [file 846440_supp_mat.pdf]

OVID search terms

#1 reflexology

#2 foot massag\*

#3 feet massag\*

#4 zone therap\*

#5 reflex therap\*

#6 relaxation technique

#7 Massag\*

#8 aromatherapy

#9 complementary therap\*

#10 Bodywork

#11 Craniosacral

#12 Rolfing

#13 Shiatsu

#14 Healing touch

#15 Soft tissue mobilisation

#16 Soft tissue manipulation

#17 Massotherapy

#18 Foot reflex

#19 Aroma

#20 Acupressure

#21 Alternative medicine

#22 Alternative therap\*

#23 Essential oil

#24 Plant oil

#25 Essence oil

#26 Swedish massage (?)

AND

#1 PALLIATIVE CARE

#2 Exp TERMINAL-CARE

#3 TERMINALLY-ILL

#4 HOSPICES

OVID search terms

#5 RESPITE-CARE

#6 palliat\*

#7 terminal\* NEAR/6 care\*

#8 terminal\* NEAR/6 caring

#9 terminal\* NEAR/6 ill\*

#10 hospice\*

#11 Endstage

#12 End of life

#13 Care of dying

#14 ((advanced or late or last or end or final) (stage or phase))

#15 Metastasi\*ed

#16 Metastatic

#17 Advance\* disease

#18 Incurable illness

#19 Incurable disease

#20 Progressive

#21 life limiting disease/illness
